# Supplementary material for: Associations between DNA Damage and PD-L1 Expression in Ovarian Cancer, a Potential Biomarker for Clinical Response
Source: MDPI journal article supplement (doi:10.3390/biology10050385), 2021-04-29
Supplement: s1 [file s1]

Supplementary Material

Table S1. OV1921 TMA.

| Position | Age | Pathology Diagnosis                      | TNM     | Full RADD | oxRADD   | PD-L1    |
|----------|-----|------------------------------------------|---------|-----------|----------|----------|
| A1       | 69  | Serous papillary adenocarcinoma          | T2bN0M0 | 46687645  | 7172893  | 12999527 |
| A2       | 72  | Serous papillary adenocarcinoma (sparse) | T2N0M0  | 94871183  | 38254279 | 20815921 |
| A4       | 36  | Serous papillary adenocarcinoma          | T2aN0M0 | 1.07E+08  | 92304513 | 16892578 |
| A5       | 57  | Serous papillary adenocarcinoma          | T2aN0M0 | 1.57E+08  | 1.12E+08 | 1.14E+08 |
| A6       | 45  | Serous papillary adenocarcinoma          | T2aN0M0 | 1.45E+08  | 1.07E+08 | 1.41E+08 |
| A7       | 35  | Serous papillary adenocarcinoma          | T2N0M0  | 75210124  | 45406843 | 52470239 |
| A8       | 50  | Mucinous papillary adenocarcinoma        | T2N0M0  | 22989721  | 7942155  | 20915685 |
| A9       | 69  | Serous papillary adenocarcinoma          | T2bN0M0 | 45927405  | 21494934 | 15868095 |
| A10      | 72  | Serous papillary adenocarcinoma          | T2N0M0  | 57166073  | 25990061 | 64899298 |
| A12      | 36  | Serous papillary adenocarcinoma          | T2aN0M0 | 72385108  | 54141069 | 99042239 |
| A13      | 57  | Serous papillary adenocarcinoma          | T2aN0M0 | 84069175  | 75995077 | 23669151 |
| A14      | 45  | Serous papillary adenocarcinoma          | T2aN0M0 | 63064697  | 31691999 | 1.64E+08 |
| A15      | 35  | Serous papillary adenocarcinoma          | T2N0M0  | 36081135  | 14723201 | 27109946 |
| A16      | 50  | Mucinous papillary adenocarcinoma        | T2N0M0  | 35021576  | 7634979  | 48127639 |
| B1       | 62  | Serous papillary adenocarcinoma          | T2bN0M0 | 94611163  | 30899963 | 47397085 |
| B2       | 60  | Serous papillary adenocarcinoma          | T2aN0M0 | 96828469  | 70908081 | 48461400 |
| B3       | 49  | Serous papillary adenocarcinoma          | T2aN0M0 | 97364876  | 83648526 | 36730508 |
| B4       | 49  | Serous papillary adenocarcinoma          | T2cN0M0 | 73787841  | 26800946 | 91406475 |
| B5       | 73  | Serous papillary adenocarcinoma          | T2aN0M0 | 1.19E+08  | 57983726 | 77341345 |
| B6       | 63  | Serous papillary adenocarcinoma (sparse) | T2bN0M0 | 1.01E+08  | 1.07E+08 | 22842619 |
| B7       | 45  | Serous papillary adenocarcinoma          | T2N0M0  | 1.31E+08  | 1.36E+08 | 26506236 |

|     |    |                                                           |         |          |          |          |
|-----|----|-----------------------------------------------------------|---------|----------|----------|----------|
| B8  | 51 | Serous papillary<br>adenocarcinoma (sparse)               | T2aN0M0 | 69237306 | 52487481 | 7173604  |
| B9  | 62 | Serous papillary<br>adenocarcinoma (fibrofatty<br>tissue) | T2bN0M0 | 1.78E+08 | 59526441 | 1.44E+08 |
| B10 | 60 | Serous papillary<br>adenocarcinoma                        | T2aN0M0 | 53270639 | 28872068 | 34905725 |
| B11 | 49 | Serous papillary<br>adenocarcinoma                        | T2aN0M0 | 50700658 | 16791951 | 39264385 |
| B12 | 49 | Serous papillary<br>adenocarcinoma                        | T2cN0M0 | 1.13E+08 | 54872259 | 85828561 |
| B13 | 73 | Serous papillary<br>adenocarcinoma                        | T2aN0M0 | 1.4E+08  | 68047951 | 72805790 |
| B14 | 63 | Serous papillary<br>adenocarcinoma                        | T2bN0M0 | 1.13E+08 | 1.26E+08 | 25455100 |
| B15 | 45 | Serous papillary<br>adenocarcinoma                        | T2N0M0  | 65769260 | 54526699 | 31403836 |
| B16 | 51 | Serous papillary<br>adenocarcinoma                        | T2aN0M0 | 41002058 | 19744249 | 8312740  |
| C1  | 49 | Serous adenocarcinoma                                     | T2N0M0  | 1.01E+08 | 9312770  | 14374533 |
| C2  | 60 | Serous papillary<br>adenocarcinoma                        | T2bN0M0 | 67143281 | 27477220 | 10025627 |
| C3  | 39 | Serous adenocarcinoma<br>(necrotic tissue)                | T2N0M0  | 88060448 | 46963994 | 51985246 |
| C4  | 56 | Serous adenocarcinoma                                     | T2N0M0  | 1.27E+08 | 97774181 | 1.68E+08 |
| C5  | 51 | Serous adenocarcinoma                                     | T2aN0M0 | 77646377 | 83957919 | 46850941 |
| C6  | 51 | Serous adenocarcinoma                                     | T2bN0M0 | 2.13E+08 | 2.18E+08 | 2.01E+08 |
| C7  | 45 | Serous adenocarcinoma                                     | T2bN0M0 | 1.93E+08 | 1.86E+08 | 10687226 |
| C8  | 51 | Serous adenocarcinoma                                     | T2N0M0  | 1.42E+08 | 1.08E+08 | 2.97E+08 |
| C9  | 49 | Serous adenocarcinoma                                     | T2N0M0  | 1.65E+08 | 43143720 | 30421334 |
| C10 | 60 | Serous papillary<br>adenocarcinoma                        | T2bN0M0 | 81339496 | 82845952 | 11899820 |
| C11 | 39 | Serous adenocarcinoma                                     | T2N0M0  | 93747674 | 1.07E+08 | 21608611 |
| C12 | 56 | Serous adenocarcinoma                                     | T2N0M0  | 1.6E+08  | 99209323 | 93976342 |
| C13 | 51 | Serous adenocarcinoma                                     | T2aN0M0 | 1.35E+08 | 1.31E+08 | 17774306 |
| C14 | 51 | Serous adenocarcinoma                                     | T2bN0M0 | 1.69E+08 | 2.11E+08 | 26912948 |
| C15 | 45 | Serous adenocarcinoma                                     | T2bN0M0 | 70601133 | 74975563 | 32852768 |
| C16 | 51 | Serous adenocarcinoma                                     | T2N0M0  | 79125918 | 15645936 | 2.35E+08 |
| D1  | 43 | Serous adenocarcinoma                                     | T2N0M0  | 72336733 | 49400468 | 1137892  |
| D2  | 56 | Serous papillary<br>adenocarcinoma                        | T2N0M0  | 1.55E+08 | 92917455 | 1.35E+08 |
| D3  | 65 | Serous papillary<br>adenocarcinoma                        | T2N0M0  | 1.59E+08 | 59578446 | 1.25E+08 |
| D4  | 63 | Serous adenocarcinoma                                     | T2N0M0  | 1.32E+08 | 1.02E+08 | 1.1E+08  |
| D5  | 75 | Serous adenocarcinoma                                     | T2N0M0  | 1.53E+08 | 1.74E+08 | 56973210 |
| D6  | 41 | Serous adenocarcinoma                                     | T2cN0M0 | 1.78E+08 | 58681090 | 2.25E+08 |

|     |    |                                   |         |          |          |          |
|-----|----|-----------------------------------|---------|----------|----------|----------|
| D7  | 56 | Serous adenocarcinoma             | T2N0M0  | 1.14E+08 | 59688103 | 78173124 |
| D8  | 48 | Serous adenocarcinoma             | T2aN0M0 | 1.24E+08 | 55261585 | 1.49E+08 |
| D9  | 43 | Serous adenocarcinoma             | T2N0M0  | 1.21E+08 | 1.44E+08 | 4927234  |
| D10 | 56 | Serous papillary adenocarcinoma   | T2N0M0  | 2.31E+08 | 1.91E+08 | 1.54E+08 |
| D11 | 65 | Serous papillary adenocarcinoma   | T2N0M0  | 2.56E+08 | 1.78E+08 | 1.31E+08 |
| D12 | 63 | Serous adenocarcinoma             | T2N0M0  | 2.46E+08 | 1.09E+08 | 1.87E+08 |
| D13 | 75 | Serous adenocarcinoma             | T2N0M0  | 2.4E+08  | 1.26E+08 | 1.05E+08 |
| D15 | 56 | Serous adenocarcinoma             | T2N0M0  | 1.14E+08 | 73411595 | 51931308 |
| D16 | 48 | Serous adenocarcinoma             | T2aN0M0 | 1.01E+08 | 16000376 | 69616850 |
| E1  | 29 | Mucinous papillary adenocarcinoma | T2aN0M0 | 62041914 | 36646530 | 2289352  |
| E2  | 50 | Mucinous papillary adenocarcinoma | T2N0M0  | 74014511 | 23314883 | 20159640 |
| E3  | 41 | Mucinous papillary adenocarcinoma | T2aN0M0 | 56917434 | 33435566 | 1091804  |
| E4  | 62 | Mucinous papillary adenocarcinoma | T2aN0M0 | 64794574 | 20853282 | 22067500 |
| E5  | 50 | Mucinous adenocarcinoma           | T2N0M0  | 46740888 | 7985952  | 92445352 |
| E6  | 41 | Mucinous adenocarcinoma           | T2aN0M0 | 1.13E+08 | 1.2E+08  | 5402673  |
| E7  | 46 | Mucinous papillary adenocarcinoma | T2N0M0  | 79091387 | 22589809 | 17256708 |
| E8  | 60 | Adenocarcinoma (necrotic tissue)  | T2N0M0  | 2.25E+08 | 41706633 | 1.43E+08 |
| E9  | 29 | Mucinous papillary adenocarcinoma | T2aN0M0 | 67571941 | 34922127 | 7360411  |
| E10 | 50 | Mucinous papillary adenocarcinoma | T2N0M0  | 59259273 | 48842265 | 10428783 |
| E11 | 41 | Mucinous papillary adenocarcinoma | T2aN0M0 | 93341278 | 52906962 | 3475426  |
| E12 | 62 | Mucinous papillary adenocarcinoma | T2aN0M0 | 72562869 | 20595666 | 15832648 |
| E13 | 50 | Mucinous adenocarcinoma           | T2N0M0  | 71657982 | 12800875 | 1.34E+08 |
| E14 | 41 | Mucinous adenocarcinoma           | T2aN0M0 | 81112210 | 1.03E+08 | 1849780  |
| E15 | 46 | Mucinous papillary adenocarcinoma | T2N0M0  | 1.08E+08 | 40859670 | 9841103  |
| E16 | 60 | Adenocarcinoma (necrotic tissue)  | T2N0M0  | 3.34E+08 | 46932211 | 3.68E+08 |
| F1  | 50 | Endometrioid adenocarcinoma       | T2aN0M0 | 93164504 | 23628819 | 16236418 |
| F2  | 68 | Endometrioid adenocarcinoma       | T2cN0M0 | 50969625 | 10126659 | 9554763  |
| F3  | 29 | Endometrioid adenocarcinoma       | T2aN0M0 | 1.15E+08 | 78816174 | 24937445 |

|     |    |                                                                         |         |          |          |          |
|-----|----|-------------------------------------------------------------------------|---------|----------|----------|----------|
| F4  | 47 | Endometrioid<br>adenocarcinoma                                          | T2aN0M0 | 66536213 | 96211587 | 1452740  |
| F5  | 48 | Clear cell carcinoma                                                    | T2N0M0  | 1.53E+08 | 18552856 | 1.7E+08  |
| F6  | 47 | Clear cell carcinoma                                                    | T2aN0M0 | 82091398 | 85671819 | 21556831 |
| F7  | 37 | Embryonal carcinoma                                                     | T2N0M0  | 83081000 | 43404412 | 2379375  |
| F8  | 47 | Squamous cell carcinoma<br>from malignant<br>transformation of teratoma | T2aN0M0 | 99719605 | 62928249 | 8030602  |
| F9  | 50 | Endometrioid<br>adenocarcinoma                                          | T2aN0M0 | 1.02E+08 | 35568328 | 47524662 |
| F10 | 68 | Endometrioid<br>adenocarcinoma                                          | T2cN0M0 | 80799744 | 34380849 | 9810302  |
| F11 | 29 | Endometrioid<br>adenocarcinoma                                          | T2aN0M0 | 52389145 | 14905299 | 37764254 |
| F12 | 47 | Endometrioid<br>adenocarcinoma                                          | T2aN0M0 | 34325748 | 27644429 | 3335389  |
| F13 | 48 | Clear cell carcinoma                                                    | T2N0M0  | 1.64E+08 | 11898301 | 3.48E+08 |
| F14 | 47 | Clear cell carcinoma                                                    | T2aN0M0 | 42280270 | 50745240 | 23540451 |
| F15 | 37 | Embryonal carcinoma                                                     | T2N0M0  | 51523434 | 60824379 | 3887743  |
| F16 | 47 | Squamous cell carcinoma<br>from malignant<br>transformation of teratoma | T2aN0M0 | 97950471 | 73287704 | 3725128  |
| G1  | 41 | Malignant granulosa cell<br>tumor                                       | T2N0M0  | 1.09E+08 | 1.04E+08 | 2299789  |
| G2  | 68 | Serous papillary<br>adenocarcinoma                                      | T3cN0M0 | 48497910 | 38696105 | 12875871 |
| G3  | 51 | Serous papillary<br>adenocarcinoma                                      | T3cN1M0 | 21451250 | 4917044  | 2927058  |
| G4  | 52 | Serous adenocarcinoma                                                   | T3cN1M0 | 41594612 | 24305092 | 2332661  |
| G5  | 51 | Serous papillary<br>adenocarcinoma                                      | T3cN1M0 | 82060205 | 44946106 | 15094205 |
| G6  | 54 | Serous papillary<br>adenocarcinoma                                      | T3cN1M0 | 86714666 | 78252515 | 2824809  |
| G7  | 66 | Serous papillary<br>adenocarcinoma                                      | T3cN1M0 | 1.92E+08 | 1.58E+08 | 86760527 |
| G8  | 26 | Serous adenocarcinoma                                                   | T3cN1M0 | 2.03E+08 | 1.92E+08 | 1.84E+08 |
| G9  | 41 | Granulosa cell tumor                                                    | T2N0M0  | 1.02E+08 | 61551110 | 3655124  |
| G10 | 68 | Serous papillary<br>adenocarcinoma                                      | T3cN0M0 | 49955003 | 26374276 | 18547636 |
| G11 | 51 | Serous papillary<br>adenocarcinoma                                      | T3cN1M0 | 83494792 | 41128333 | 1752751  |
| G13 | 51 | Serous papillary<br>adenocarcinoma                                      | T3cN1M0 | 45191560 | 20807624 | 6173111  |
| G14 | 54 | Serous papillary<br>adenocarcinoma                                      | T3cN1M0 | 81667950 | 90127100 | 1917293  |

|     |    |                                 |         |          |          |          |
|-----|----|---------------------------------|---------|----------|----------|----------|
| G15 | 66 | Serous papillary adenocarcinoma | T3cN1M0 | 1.9E+08  | 85395127 | 2.55E+08 |
| G16 | 26 | Serous adenocarcinoma           | T3cN1M0 | 82429177 | 9396364  | 1.87E+08 |
| H1  | 38 | Serous papillary adenocarcinoma | T3bN1M0 | 88166767 | 90634267 | 68743887 |
| H2  | 48 | Serous adenocarcinoma           | T3cN0M0 | 70245846 | 63423850 | 3358198  |
| H3  | 48 | Serous papillary adenocarcinoma | T2N1M0  | 74096571 | 52978422 | 4385282  |
| H4  | 57 | Serous papillary adenocarcinoma | T3cN1M0 | 1.59E+08 | 85340333 | 87358568 |
| H5  | 42 | Serous adenocarcinoma           | T1N1M0  | 1.76E+08 | 1.16E+08 | 1.6E+08  |
| H6  | 64 | Serous adenocarcinoma           | T3cN1M0 | 1.51E+08 | 1.55E+08 | 50301620 |
| H7  | 54 | Serous adenocarcinoma           | T2N1M0  | 97653074 | 50569155 | 52505296 |
| H8  | 32 | Serous adenocarcinoma           | T3cN0M0 | 1.07E+08 | 38057254 | 63472167 |
| H9  | 38 | Serous papillary adenocarcinoma | T3bN1M0 | 87154842 | 51943262 | 1.35E+08 |
| H10 | 48 | Serous adenocarcinoma           | T3cN0M0 | 49216996 | 35733994 | 5100034  |
| H11 | 48 | Serous papillary adenocarcinoma | T2N1M0  | 62017496 | 26158750 | 38690511 |
| H12 | 57 | Serous papillary adenocarcinoma | T3cN1M0 | 71601732 | 23611585 | 29108249 |
| H13 | 42 | Serous adenocarcinoma           | T1N1M0  | 8625300  | 462422   | 28661321 |
| H14 | 64 | Serous adenocarcinoma           | T3cN1M0 | 2.04E+08 | 1.71E+08 | 1.83E+08 |
| H15 | 54 | Serous adenocarcinoma           | T2N1M0  | 1.05E+08 | 91400128 | 9621535  |
| H16 | 32 | Serous adenocarcinoma           | T3cN0M0 | 85672805 | 51286241 | 11482580 |
| I1  | 62 | Serous adenocarcinoma           | T3N0M0  | 57463400 | 45717932 | 4716196  |
| I2  | 60 | Serous adenocarcinoma           | T3cN0M0 | 69042071 | 64482141 | 1133675  |
| I3  | 66 | Serous adenocarcinoma           | T2N1M0  | 38392009 | 31665439 | 8167520  |
| I4  | 56 | Serous adenocarcinoma           | T3N1M0  | 46390784 | 31681989 | 6915891  |
| I5  | 46 | Serous adenocarcinoma           | T3aN1M0 | 1.8E+08  | 85354947 | 2.64E+08 |
| I6  | 46 | Serous adenocarcinoma           | T2N1M0  | 1.45E+08 | 98300923 | 1.23E+08 |
| I8  | 49 | Serous adenocarcinoma           | T3N1M0  | 92702618 | 53854715 | 15931219 |
| I9  | 62 | Serous adenocarcinoma           | T3N0M0  | 64114263 | 50048092 | 1712080  |
| I10 | 60 | Serous adenocarcinoma           | T3cN0M0 | 1.1E+08  | 85142305 | 1464084  |
| I11 | 66 | Serous adenocarcinoma           | T2N1M0  | 41537082 | 19635958 | 1793884  |
| I12 | 56 | Serous adenocarcinoma           | T3N1M0  | 45221056 | 31922619 | 8025159  |
| I13 | 46 | Serous adenocarcinoma           | T3aN1M0 | 2.2E+08  | 1.46E+08 | 2.69E+08 |
| I14 | 46 | Serous adenocarcinoma           | T2N1M0  | 1.55E+08 | 1.09E+08 | 1.13E+08 |
| I15 | 47 | Serous adenocarcinoma           | T3cN1M0 | 96244345 | 1.07E+08 | 1225059  |
| I16 | 49 | Serous adenocarcinoma           | T3N1M0  | 1.15E+08 | 1.05E+08 | 5875082  |
| J1  | 57 | Serous papillary adenocarcinoma | T3cN0M0 | 63943168 | 25323491 | 98209738 |
| J2  | 46 | Serous adenocarcinoma           | T2cN1M0 | 1.09E+08 | 79542901 | 29129841 |
| J3  | 57 | Serous papillary adenocarcinoma | T3cN1M0 | 1.37E+08 | 56723093 | 69850520 |

|     |    |                                                   |         |          |          |          |
|-----|----|---------------------------------------------------|---------|----------|----------|----------|
| J4  | 42 | Serous papillary adenocarcinoma                   | T3cN1M0 | 76279921 | 38714715 | 35654079 |
| J5  | 65 | Serous papillary adenocarcinoma                   | T3cN0M0 | 1.02E+08 | 85442945 | 11563175 |
| J6  | 66 | Mucinous adenocarcinoma (mucago and blood vessel) | T3cN0M0 | 47355981 | 25322081 | 15277510 |
| J7  | 67 | Clear cell carcinoma                              | T3N2M0  | 46748724 | 63596277 | 37076070 |
| J8  | 55 | Transitional cell carcinoma                       | T3cN0M0 | 80739952 | 80526905 | 1402083  |
| J9  | 57 | Serous papillary adenocarcinoma                   | T3cN0M0 | 1.28E+08 | 55323336 | 90194594 |
| J10 | 46 | Serous adenocarcinoma                             | T2cN1M0 | 99661200 | 54051809 | 64127706 |
| J11 | 57 | Serous papillary adenocarcinoma                   | T3cN1M0 | 78096008 | 34103421 | 54037203 |
| J12 | 42 | Serous papillary adenocarcinoma                   | T3cN1M0 | 1.32E+08 | 98199782 | 90312302 |
| J13 | 65 | Serous papillary adenocarcinoma                   | T3cN0M0 | 1.17E+08 | 1.13E+08 | 3575409  |
| J15 | 67 | Clear cell carcinoma                              | T3N2M0  | 26519694 | 32710092 | 41799326 |
| J16 | 55 | Transitional cell carcinoma                       | T3cN0M0 | 45267433 | 59531673 | 1767077  |
| K1  | 62 | Malignant granulosa cell tumor                    | T2N0M0  | 1.13E+08 | 97000850 | 36723584 |
| K2  | 38 | Serous papillary adenocarcinoma (stroma)          | -       | 93602035 | 60793075 | 46384177 |
| K3  | 69 | Serous papillary adenocarcinoma                   | -       | 1.27E+08 | 1.41E+08 | 1256875  |
| K4  | 66 | Serous papillary adenocarcinoma                   | -       | 1.04E+08 | 45890397 | 22136250 |
| K5  | 65 | Serous papillary adenocarcinoma                   | -       | 1.18E+08 | 1.04E+08 | 1560191  |
| K6  | 37 | Serous adenocarcinoma                             | -       | 98880812 | 69667971 | 38550545 |
| K7  | 56 | Serous papillary adenocarcinoma                   | -       | 47957235 | 58374700 | 5749585  |
| K8  | 54 | Serous papillary adenocarcinoma                   | -       | 50313240 | 51214755 | 1824937  |
| K9  | 62 | Malignant granulosa cell tumor                    | T2N0M0  | 1.23E+08 | 12353313 | 95813823 |
| K10 | 38 | Serous papillary adenocarcinoma                   | -       | 46941224 | 10814350 | 55030910 |
| K11 | 69 | Serous papillary adenocarcinoma                   | -       | 40993089 | 38608041 | 2193635  |
| K12 | 66 | Serous papillary adenocarcinoma                   | -       | 1.19E+08 | 46290130 | 41158050 |
| K13 | 65 | Serous papillary adenocarcinoma                   | -       | 62539933 | 42630967 | 10674467 |
| K14 | 37 | Serous adenocarcinoma                             | -       | 1.43E+08 | 46107163 | 2.15E+08 |

|     |    |                                                           |   |          |          |          |
|-----|----|-----------------------------------------------------------|---|----------|----------|----------|
| K15 | 56 | Serous papillary adenocarcinoma                           | - | 78444550 | 69825668 | 27203186 |
| K16 | 54 | Serous papillary adenocarcinoma                           | - | 47074418 | 55675534 | 1771351  |
| L1  | 55 | Serous adenocarcinoma                                     | - | 25760073 | 29911561 | 731800   |
| L2  | 41 | Serous adenocarcinoma                                     | - | 60778530 | 60748782 | 1273583  |
| L3  | 56 | Serous adenocarcinoma                                     | - | 1.13E+08 | 43951145 | 68581132 |
| L4  | 50 | Mucinous adenocarcinoma                                   | - | 80398799 | 46818260 | 8613476  |
| L5  | 51 | Mucinous adenocarcinoma                                   | - | 38257676 | 5958955  | 41309290 |
| L6  | 58 | Serous papillary adenocarcinoma with clear cell carcinoma | - | 21052067 | 29459471 | 4175218  |
| L7  | 59 | Endodermal sinus carcinoma                                | - | 47760277 | 54076679 | 1553034  |
| L8  | 16 | Endodermal sinus carcinoma                                | - | 22260271 | 12877206 | 32817840 |
| L9  | 55 | Serous adenocarcinoma                                     | - | 28369710 | 15610045 | 8427005  |
| L10 | 41 | Serous adenocarcinoma                                     | - | 29781530 | 22453782 | 10734708 |
| L11 | 56 | Serous adenocarcinoma                                     | - | 90185625 | 38897175 | 1.4E+08  |
| L12 | 50 | Mucinous adenocarcinoma                                   | - | 1.02E+08 | 44219152 | 53130918 |
| L13 | 51 | Mucinous adenocarcinoma                                   | - | 54604100 | 7216159  | 66854466 |
| L14 | 58 | Serous papillary adenocarcinoma with clear cell carcinoma | - | 27049336 | 23928014 | 2413366  |
| L15 | 59 | Endodermal sinus carcinoma                                | - | 52619346 | 60828208 | 518613   |
| L16 | 16 | Endodermal sinus carcinoma                                | - | 30036751 | 8729810  | 26158221 |

**Table S2.** OV1501b TMA.

| Position | Age | Pathology Diagnosis                     | TNM     | Full RADD | oxRADD   | PD-L1    |
|----------|-----|-----------------------------------------|---------|-----------|----------|----------|
| A1       | 54  | Ovary tissue                            | -       | 38189629  | 4080686  | 9940911  |
| A2       | 53  | Adjacent normal ovary tissue            | -       | 69195228  | 31630619 | 1.79E+08 |
| A3       | 48  | Mucinous adenocarcinoma                 | T1aN0M0 | 61147450  | 22723130 | 8034127  |
| A4       | 46  | Theca cell tumor                        | -       | 57090519  | 45768812 | 50753206 |
| A5       | 30  | Borderline serous papillary cystadenoma | -       | 62707763  | 31992408 | 19385811 |
| A6       | 47  | High grade serous carcinoma             | T3cN1M0 | 54774082  | 8916683  | 1449589  |
| A7       | 49  | High grade serous carcinoma             | T2N0M0  | 56511506  | 2260742  | 60696269 |
| A8       | 41  | Metastatic adenocarcinoma               | -       | 30445713  | 9660247  | 7464648  |

|     |    |                                         |         |          |          |          |
|-----|----|-----------------------------------------|---------|----------|----------|----------|
| A9  | 25 | Low grade serous carcinoma              | T1N0M0  | 22638056 | 15154574 | 59219012 |
| A10 | 55 | Endometrioid adenocarcinoma             | T1N0M0  | 59914211 | 1672523  | 4008831  |
| A11 | 34 | Low grade serous carcinoma              | T1bN0M0 | 9395017  | 7599493  | 31041794 |
| A12 | 41 | Endometrioid adenocarcinoma             | T1aN0M0 | 1.67E+08 | 41611754 | 3.2E+08  |
| A13 | 49 | Endometrioid adenocarcinoma             | T1aN0M0 | 1.35E+08 | 8176664  | 1.08E+08 |
| A14 | 34 | Low grade serous carcinoma              | T1aN0M0 | 3970939  | 1147104  | 3041548  |
| A15 | 54 | High grade serous carcinoma             | T1aN0M0 | 92987764 | 5480120  | 2.79E+08 |
| B1  | 54 | Ovary tissue                            | -       | 37053711 | 8270548  | 10223759 |
| B2  | 53 | Adjacent normal ovary tissue            | -       | 70184641 | 21623157 | 2.13E+08 |
| B3  | 48 | Mucinous adenocarcinoma                 | T1aN0M0 | 48639488 | 17349353 | 19525126 |
| B4  | 46 | Theca cell tumor                        | -       | 38564982 | 17042143 | 31837607 |
| B5  | 30 | Borderline serous papillary cystadenoma | -       | 44942164 | 9485527  | 48819879 |
| B6  | 47 | High grade serous carcinoma             | T3cN1M0 | 43785565 | 17330775 | 3904577  |
| B7  | 49 | High grade serous carcinoma             | T2N0M0  | 1.03E+08 | 33862954 | 2.12E+08 |
| B8  | 41 | Metastatic adenocarcinoma               | -       | 80925089 | 70092840 | 4807915  |
| B9  | 25 | Low grade serous carcinoma              | T1N0M0  | 1.09E+08 | 72883251 | 2.55E+08 |
| B10 | 55 | Endometrioid adenocarcinoma             | T1N0M0  | 1.72E+08 | 1.35E+08 | 6417943  |
| B11 | 34 | Low grade serous carcinoma              | T1bN0M0 | 70448365 | 51481175 | 43788357 |
| B12 | 41 | Endometrioid adenocarcinoma             | T1aN0M0 | 2.3E+08  | 2.14E+08 | 2.17E+08 |
| B13 | 49 | Endometrioid adenocarcinoma             | T1aN0M0 | 1.68E+08 | 1.21E+08 | 1.95E+08 |
| B14 | 34 | Low grade serous carcinoma              | T1aN0M0 | 1.15E+08 | 99409186 | 14305611 |
| B15 | 54 | High grade serous carcinoma             | T1aN0M0 | 1.12E+08 | 36758961 | 3.95E+08 |
| C1  | 68 | High grade serous carcinoma             | T1aN0M0 | 1.11E+08 | 1.31E+08 | 36500805 |
| C2  | 42 | High grade serous carcinoma             | T2N0M0  | 1.82E+08 | 2.27E+08 | 29062593 |



|     |    |                             |         |          |          |          |
|-----|----|-----------------------------|---------|----------|----------|----------|
| C3  | 26 | Undifferentiated carcinoma  | T1aN0M0 | 51643154 | 1.31E+08 | 7662460  |
| C4  | 43 | Endometrioid adenocarcinoma | T1aN0M0 | 87375850 | 1.27E+08 | 9768760  |
| C5  | 46 | High grade serous carcinoma | T2cN1M0 | 63872878 | 1.09E+08 | 30306205 |
| C6  | 53 | Endometrioid adenocarcinoma | T2aN0M0 | 1.2E+08  | 1.29E+08 | 4788524  |
| C7  | 42 | High grade serous carcinoma | T3cN1M0 | 1.81E+08 | 2.2E+08  | 23835744 |
| C8  | 57 | High grade serous carcinoma | T3cN1M0 | 1.46E+08 | 1.78E+08 | 21046378 |
| C9  | 54 | Endometrioid adenocarcinoma | T1bN0M0 | 1.22E+08 | 54337880 | 5287497  |
| C10 | 42 | Mucinous adenocarcinoma     | T1aN0M0 | 1.09E+08 | 1.02E+08 | 28298428 |
| C11 | 40 | Mucinous adenocarcinoma     | T1aN0M0 | 70596622 | 61795641 | 23976816 |
| C12 | 61 | Endometrioid adenocarcinoma | T3N0M0  | 1.12E+08 | 74244398 | 2.49E+08 |
| C13 | 24 | Undifferentiated carcinoma  | T1aN0M0 | 1.7E+08  | 1.65E+08 | 16073444 |
| C14 | 22 | Low grade serous carcinoma  | T2bN0M0 | 1.14E+08 | 1.25E+08 | 44987626 |
| C15 | 48 | High grade serous carcinoma | T1N0M0  | 94045564 | 75444679 | 4760914  |
| D1  | 68 | High grade serous carcinoma | T1aN0M0 | 1.42E+08 | 1.08E+08 | 90844971 |
| D2  | 42 | High grade serous carcinoma | T2N0M0  | 1.03E+08 | 1.42E+08 | 33219912 |
| D3  | 26 | Undifferentiated carcinoma  | T1aN0M0 | 65863412 | 1.09E+08 | 11968683 |
| D4  | 43 | Endometrioid adenocarcinoma | T1aN0M0 | 87048070 | 1.16E+08 | 9480310  |
| D5  | 46 | High grade serous carcinoma | T2cN1M0 | 1.25E+08 | 1.44E+08 | 64483780 |
| D6  | 53 | Endometrioid adenocarcinoma | T2aN0M0 | 86151122 | 1.13E+08 | 2461169  |
| D7  | 42 | High grade serous carcinoma | T3cN1M0 | 1.52E+08 | 1.27E+08 | 1.95E+08 |
| D8  | 57 | High grade serous carcinoma | T3cN1M0 | 1.05E+08 | 1.18E+08 | 91962406 |
| D9  | 54 | Endometrioid adenocarcinoma | T1bN0M0 | 1.65E+08 | 1.09E+08 | 34080076 |
| D10 | 42 | Mucinous adenocarcinoma     | T1aN0M0 | 60665873 | 27420650 | 29957069 |

|     |    |                             |         |          |          |          |
|-----|----|-----------------------------|---------|----------|----------|----------|
| D11 | 40 | Mucinous adenocarcinoma     | T1aN0M0 | 77427665 | 89431067 | 11801988 |
| D12 | 61 | Endometrioid adenocarcinoma | T3N0M0  | 1.72E+08 | 93925419 | 1.63E+08 |
| D13 | 24 | Undifferentiated carcinoma  | T1aN0M0 | 1.97E+08 | 2.15E+08 | 18369286 |
| D14 | 22 | Low grade serous carcinoma  | T2bN0M0 | 99983159 | 1.03E+08 | 21995407 |
| D15 | 48 | High grade serous carcinoma | T1N0M0  | 1.26E+08 | 1.63E+08 | 17226091 |
| E1  | 54 | Mucinous adenocarcinoma     | -       | 37922535 | 7221626  | 36289527 |
| E2  | 60 | Endometrioid adenocarcinoma | T1bN0M0 | 1.39E+08 | 1.2E+08  | 86470068 |
| E3  | 44 | Endometrioid adenocarcinoma | T1N0M0  | 1.78E+08 | 2.13E+08 | 3868292  |
| E4  | 44 | Endometrioid adenocarcinoma | T1aN0M0 | 99301650 | 1.1E+08  | 23407356 |
| E5  | 48 | Mucinous adenocarcinoma     | T1bN0M0 | 32284631 | 32572333 | 1067046  |
| E6  | 52 | Endometrioid adenocarcinoma | T1aN0M0 | 1.59E+08 | 1.63E+08 | 11653720 |
| E7  | 16 | Endodermal sinus carcinoma  | T2N0M0  | 84827966 | 1.17E+08 | 20004160 |
| E8  | 22 | Endodermal sinus carcinoma  | T1cN0M0 | 57033994 | 73920490 | 15673715 |
| E9  | 38 | Low grade serous carcinoma  | T3cN1M0 | 52257696 | 40710749 | 56536370 |
| E10 | 59 | Endometrioid adenocarcinoma | T2bN0M0 | 1.3E+08  | 1.57E+08 | 7354473  |
| E11 | 46 | Endometrioid adenocarcinoma | T2N0M0  | 67094479 | 26526505 | 6769506  |
| E12 | 54 | Endometrioid adenocarcinoma | T1cN0M0 | 1.22E+08 | 1.41E+08 | 5570482  |
| E13 | 47 | Endometrioid adenocarcinoma | T2aN0M0 | 65281202 | 65167217 | 26901757 |
| E14 | 42 | Mucinous adenocarcinoma     | T1aN0M0 | 92380554 | 86530535 | 8432604  |
| E15 | 29 | Mucinous adenocarcinoma     | T3N0M0  | 1.91E+08 | 1.4E+08  | 54656972 |
| F1  | 54 | Mucinous adenocarcinoma     | -       | 48401867 | 48401867 | 17006208 |
| F2  | 60 | Endometrioid adenocarcinoma | T1bN0M0 | 1.78E+08 | 1.78E+08 | 34631264 |
| F3  | 44 | Endometrioid adenocarcinoma | T1N0M0  | 1.5E+08  | 1.5E+08  | 18936305 |

|     |    |                              |         |          |          |          |
|-----|----|------------------------------|---------|----------|----------|----------|
| F4  | 44 | Endometrioid adenocarcinoma  | T1aN0M0 | 82259045 | 82259045 | 11086924 |
| F5  | 48 | Mucinous adenocarcinoma      | T1bN0M0 | 65230638 | 65230638 | 2360817  |
| F6  | 52 | Endometrioid adenocarcinoma  | T1aN0M0 | 1.5E+08  | 1.5E+08  | 16633375 |
| F7  | 16 | Endodermal sinus carcinoma   | T2N0M0  | 1.15E+08 | 1.15E+08 | 26905808 |
| F8  | 22 | Endodermal sinus carcinoma   | T1cN0M0 | 75305212 | 75305212 | 50270261 |
| F9  | 38 | Low grade serous carcinoma   | T3cN1M0 | 90496578 | 90496578 | 81880575 |
| F10 | 59 | Endometrioid adenocarcinoma  | T2bN0M0 | 1.54E+08 | 1.54E+08 | 5299689  |
| F11 | 46 | Endometrioid adenocarcinoma  | T2N0M0  | 69915285 | 69915285 | 12019488 |
| F12 | 54 | Endometrioid adenocarcinoma  | T1cN0M0 | 1.12E+08 | 1.12E+08 | 4522816  |
| F13 | 47 | Endometrioid adenocarcinoma  | T2aN0M0 | 58282477 | 58282477 | 2644924  |
| F14 | 42 | Mucinous adenocarcinoma      | T1aN0M0 | 1.03E+08 | 1.03E+08 | 3989418  |
| F15 | 29 | Mucinous adenocarcinoma      | T3N0M0  | 1.83E+08 | 1.83E+08 | 43402933 |
| G1  | 45 | High grade serous carcinoma  | T1aN0M0 | 77888789 | 19403347 | 1.76E+08 |
| G2  | 46 | Lowly malignant fibrosarcoma | T2N0M0  | 43491704 | 94226988 | 2703940  |
| G3  | 55 | High grade serous carcinoma  | T1N0M0  | 1.79E+08 | 1.71E+08 | 2.07E+08 |
| G4  | 58 | High grade serous carcinoma  | T1N0M0  | 1.45E+08 | 1.46E+08 | 1.13E+08 |
| G5  | 32 | Endodermal sinus carcinoma   | T2bN0M0 | 1.27E+08 | 1.58E+08 | 5446823  |
| G6  | 47 | High grade serous carcinoma  | T1aN0M0 | 2.25E+08 | 2.35E+08 | 1.96E+08 |
| G7  | 60 | Mucinous adenocarcinoma      | T1aN0M0 | 8014733  | 7921094  | 5467906  |
| G8  | 52 | High grade serous carcinoma  | T3N0M0  | 1.77E+08 | 1.74E+08 | 2.07E+08 |
| G9  | 47 | Endometrioid adenocarcinoma  | T2aN0M0 | 1.94E+08 | 2.2E+08  | 4981289  |
| G10 | 34 | Endometrioid adenocarcinoma  | T1N0M0  | 1.47E+08 | 1.26E+08 | 48228737 |
| G11 | 19 | Mucinous adenocarcinoma      | T2aN0M0 | 84481256 | 88575899 | 5396019  |
| G12 | 44 | Granular cell tumor          | T1cN0M0 | 2.58E+08 | 2.21E+08 | 1.66E+08 |

|     |    |                              |         |          |          |          |
|-----|----|------------------------------|---------|----------|----------|----------|
| G13 | 65 | High grade serous carcinoma  | T2N0M0  | 1.8E+08  | 1.26E+08 | 1.86E+08 |
| G14 | 47 | Endometrioid adenocarcinoma  | T1cN0M0 | 1.4E+08  | 1.21E+08 | 48654694 |
| G15 | 68 | Endometrioid adenocarcinoma  | T2cN0M0 | 1.23E+08 | 81889929 | 11136307 |
| H1  | 45 | High grade serous carcinoma  | T1aN0M0 | 98708300 | 14428187 | 2.6E+08  |
| H2  | 46 | Lowly malignant fibrosarcoma | T2N0M0  | 35740756 | 71811378 | 5497185  |
| H3  | 55 | High grade serous carcinoma  | T1N0M0  | 1.5E+08  | 1.3E+08  | 2.05E+08 |
| H4  | 58 | High grade serous carcinoma  | T1N0M0  | 2.02E+08 | 2.49E+08 | 94419864 |
| H5  | 32 | Endodermal sinus carcinoma   | T2bN0M0 | 90454363 | 1.72E+08 | 9569600  |
| H6  | 47 | High grade serous carcinoma  | T1aN0M0 | 2.33E+08 | 2.27E+08 | 1.13E+08 |
| H7  | 60 | Mucinous adenocarcinoma      | T1aN0M0 | 4314876  | 4436895  | 4348589  |
| H8  | 52 | High grade serous carcinoma  | T3N0M0  | 88615455 | 1.17E+08 | 37227512 |
| H9  | 47 | Endometrioid adenocarcinoma  | T2aN0M0 | 91466716 | 1.78E+08 | 3936449  |
| H10 | 34 | Endometrioid adenocarcinoma  | T1N0M0  | 1.14E+08 | 1.59E+08 | 44228776 |
| H11 | 19 | Mucinous adenocarcinoma      | T2aN0M0 | 30590028 | 31955347 | 5279454  |
| H12 | 44 | Granular cell tumor          | T1cN0M0 | 2.41E+08 | 2.27E+08 | 1.97E+08 |
| H13 | 65 | High grade serous carcinoma  | T2N0M0  | 1.67E+08 | 1.31E+08 | 2.25E+08 |
| H14 | 47 | Endometrioid adenocarcinoma  | T1cN0M0 | 69684525 | 73049409 | 49826598 |
| H15 | 68 | Endometrioid adenocarcinoma  | T2cN0M0 | 58277424 | 45742335 | 10512635 |
| I1  | 12 | Dysgerminoma                 | T1bN0M0 | 1.04E+08 | 1344747  | 2.52E+08 |
| I2  | 55 | Endometrioid adenocarcinoma  | T1cN0M0 | 45184525 | 55398519 | 6413749  |
| I3  | 44 | High grade serous carcinoma  | T1aN0M0 | 1.64E+08 | 15667587 | 5.68E+08 |
| I4  | 52 | High grade serous carcinoma  | T1aN0M0 | 89201740 | 11580470 | 1.92E+08 |
| I5  | 61 | Mucinous carcinoma           | T1cN0M0 | 53526865 | 59784481 | 3498453  |
| I6  | 65 | Endometrioid adenocarcinoma  | T1aN0M0 | 1.3E+08  | 1.91E+08 | 95410554 |

|     |    |                             |         |          |          |          |
|-----|----|-----------------------------|---------|----------|----------|----------|
| I7  | 40 | Mucinous adenocarcinoma     | T1cN0M0 | 15137528 | 20512696 | 2462519  |
| I8  | 50 | Endometrioid adenocarcinoma | T1aN0M0 | 1.32E+08 | 1.11E+08 | 1.1E+08  |
| I9  | 40 | High grade serous carcinoma | T1aN0M0 | 1.1E+08  | 1.03E+08 | 1.15E+08 |
| I10 | 43 | Endometrioid adenocarcinoma | T1cN0M0 | 49284687 | 5317113  | 53619682 |
| I11 | 54 | High grade serous carcinoma | T3cN0M0 | 89020171 | 1.82E+08 | 13128758 |
| I12 | 47 | Endometrioid adenocarcinoma | T1cN0M0 | 26953465 | 31721948 | 21188719 |
| I13 | 55 | High grade serous carcinoma | T1cN0M0 | 1.69E+08 | 2.05E+08 | 2.45E+08 |
| I14 | 34 | Mucinous adenocarcinoma     | T1aN0M0 | 54538618 | 58091463 | 84638450 |
| I15 | 56 | Mucinous adenocarcinoma     | T1N0M0  | 10910047 | 15594096 | 4824936  |
| J1  | 12 | Dysgerminoma                | T1bN0M0 | 65986436 | 116013   | 2.24E+08 |
| J2  | 55 | Endometrioid adenocarcinoma | T1cN0M0 | 22373965 | 17328330 | 8359661  |
| J3  | 44 | High grade serous carcinoma | T1aN0M0 | 1.14E+08 | 1244644  | 3.6E+08  |
| J4  | 52 | High grade serous carcinoma | T1aN0M0 | 53440004 | 1574737  | 75740651 |
| J5  | 61 | Mucinous carcinoma          | T1cN0M0 | 24286700 | 47370131 | 989900   |
| J6  | 65 | Endometrioid adenocarcinoma | T1aN0M0 | 52479139 | 82467714 | 63879752 |
| J7  | 40 | Mucinous adenocarcinoma     | T1cN0M0 | 6070642  | 6630725  | 1769486  |
| J8  | 50 | Endometrioid adenocarcinoma | T1aN0M0 | 1.82E+08 | 37011990 | 3.97E+08 |
| J9  | 40 | High grade serous carcinoma | T1aN0M0 | 51460908 | 40759650 | 35856962 |
| J10 | 43 | Endometrioid adenocarcinoma | T1cN0M0 | 31897326 | 3795581  | 61280504 |
| J11 | 54 | High grade serous carcinoma | T3cN0M0 | 3013899  | 2765771  | 1277535  |
| J12 | 47 | Endometrioid adenocarcinoma | T1cN0M0 | 15766833 | 21339066 | 6973290  |
| J13 | 55 | High grade serous carcinoma | T1cN0M0 | 36952261 | 49755455 | 45874657 |
| J14 | 34 | Mucinous adenocarcinoma     | T1aN0M0 | 23880034 | 21810362 | 33798594 |
| J15 | 56 | Mucinous adenocarcinoma     | T1N0M0  | 2497840  | 3222704  | 3180510  |

Table S3. BC110118A1 TMA.

| Position | Age | Pathology Diagnosis         | TNM     | Full RADD | oxRADD   | PD-L1    |
|----------|-----|-----------------------------|---------|-----------|----------|----------|
| A1       | 53  | High grade serous carcinoma | T2N0M1  | 15891942  | 106545   | 1695665  |
| A2       | 42  | High grade serous carcinoma | T1N0M0  | 51273969  | 34847687 | 10686068 |
| A3       | 26  | Low grade serous carcinoma  | T1cN0M0 | 41914645  | 9459747  | 23385415 |
| A4       | 51  | High grade serous carcinoma | T3cN1M0 | 19723672  | 473264   | 2751123  |
| A5       | 69  | Mucinous adenocarcinoma     | T1aN0M0 | 13660855  | 71699    | 17813869 |
| A6       | 48  | High grade serous carcinoma | T1N0M0  | 7702451   | 191460   | 3205776  |
| A7       | 57  | High grade serous carcinoma | T1cN0M0 | 62047296  | 2696294  | 2.44E+08 |
| A8       | 50  | High grade serous carcinoma | T2N0M0  | 38179084  | 8583684  | 97568468 |
| A9       | 47  | High grade serous carcinoma | T1N0M0  | 20426754  | 2109507  | 33164599 |
| B1       | 56  | High grade serous carcinoma | T2N0M0  | 56401186  | 29216186 | 4566151  |
| B2       | 35  | High grade serous carcinoma | T1aN0M0 | 1.46E+08  | 1.07E+08 | 62523382 |
| B3       | 26  | High grade serous carcinoma | T3cN1M0 | 1.87E+08  | 1.42E+08 | 1.74E+08 |
| B4       | 22  | High grade serous carcinoma | T2bN0M0 | 1.51E+08  | 26831942 | 1.18E+08 |
| B5       | 53  | High grade serous carcinoma | T1cN0M0 | 1.16E+08  | 12736377 | 65944287 |
| B6       | 32  | High grade serous carcinoma | T1N0M0  | 84107803  | 32873927 | 78970770 |
| B7       | 46  | High grade serous carcinoma | T1aN0M0 | 75299468  | 18638847 | 88640636 |
| B8       | 50  | High grade serous carcinoma | T1aN0M0 | 1.65E+08  | 32822786 | 21753598 |
| B9       | 49  | High grade serous carcinoma | T1aN0M0 | 1.05E+08  | 51966713 | 7336006  |
| C1       | 52  | Mucinous adenocarcinoma     | T1N0M0  | 62097839  | 15968707 | 30528186 |
| C2       | 38  | High grade serous carcinoma | T3bN1M0 | 1.44E+08  | 1.4E+08  | 26594907 |
| C3       | 49  | High grade serous carcinoma | T2N0M0  | 2.27E+08  | 79941739 | 1.9E+08  |
| C4       | 58  | High grade serous carcinoma | T1N0M0  | 1.18E+08  | 16773335 | 1.57E+08 |

|    |    |                             |         |          |          |          |
|----|----|-----------------------------|---------|----------|----------|----------|
| C5 | 50 | High grade serous carcinoma | T1N0M0  | 1.11E+08 | 20491881 | 1.15E+08 |
| C6 | 52 | High grade serous carcinoma | T2aN0M0 | 53300664 | 2113514  | 1193901  |
| C7 | 65 | High grade serous carcinoma | T2N0M0  | 2.92E+08 | 31986122 | 1.51E+08 |
| C8 | 46 | High grade serous carcinoma | T2cN1M0 | 1.62E+08 | 41842878 | 1.08E+08 |
| C9 | 54 | High grade serous carcinoma | T3cN0M0 | 1.76E+08 | 89142707 | 55655481 |
| D1 | 55 | High grade serous carcinoma | T2N0M0  | 74314648 | 35659841 | 34098331 |
| D2 | 42 | High grade serous carcinoma | T3cN1M0 | 1.2E+08  | 10482092 | 1.03E+08 |
| D3 | 47 | High grade serous carcinoma | T1cN0M0 | 84585485 | 19763847 | 59027047 |
| D4 | 51 | High grade serous carcinoma | T1N0M0  | 39056450 | 12469054 | 8330356  |
| D5 | 57 | High grade serous carcinoma | T3cN1M0 | 1.4E+08  | 31713413 | 1.25E+08 |
| D6 | 46 | High grade serous carcinoma | T3aN1M0 | 2.51E+08 | 72188914 | 3.98E+08 |
| D7 | 42 | High grade serous carcinoma | T2N0M0  | 1.41E+08 | 8544728  | 56342521 |
| D8 | 49 | High grade serous carcinoma | T2N0M0  | 2.27E+08 | 40210318 | 72624214 |
| D9 | 52 | High grade serous carcinoma | T2N0M0  | 2.06E+08 | 1.26E+08 | 1.24E+08 |
| E1 | 49 | High grade serous carcinoma | T1N0M0  | 1.49E+08 | 1.45E+08 | 2.07E+08 |
| E2 | 52 | High grade serous carcinoma | T1aN0M0 | 90997067 | 47539623 | 1.62E+08 |
| E3 | 49 | High grade serous carcinoma | T1N0M0  | 1.2E+08  | 48009206 | 1.52E+08 |
| E4 | 39 | Endometrioid adenocarcinoma | T1aN0M0 | 53491570 | 39968858 | 80822002 |
| E5 | 55 | Endometrioid adenocarcinoma | T1N0M0  | 98816687 | 25899711 | 1.18E+08 |
| E6 | 48 | Clear-cell carcinoma        | T2N0M0  | 1.05E+08 | 4127893  | 65338663 |
| E7 | 43 | Clear-cell carcinoma        | T1N0M0  | 53413796 | 28780784 | 7281253  |
| E8 | 40 | Clear-cell carcinoma        | T1N0M0  | 1.08E+08 | 52733190 | 30152321 |
| E9 | 27 | Endodermal sinus carcinoma  | T1N0M0  | 74096861 | 951934   | 17603528 |
| F1 | 44 | Granular cell tumor         | T1cN0M0 | 91039929 | 67979979 | 2.1E+08  |
| F2 | 57 | Granular cell tumor         | T1N0M0  | 1.14E+08 | 25794655 | 71202714 |
| F3 | 43 | Granular cell tumor         | T1N0M0  | 50032063 | 1179162  | 56345739 |

|    |    |                                                                  |         |          |          |          |
|----|----|------------------------------------------------------------------|---------|----------|----------|----------|
| F4 | 13 | Dysgerminoma                                                     | T1aN0M0 | 74562962 | 59905312 | 35361484 |
| F5 | 35 | Dysgerminoma                                                     | T1aN0M0 | 77862131 | 51224583 | 1.18E+08 |
| F6 | 41 | Dysgerminoma                                                     | T1N0M0  | 56900862 | 20406104 | 9477681  |
| F7 | 34 | Low grade serous carcinoma                                       | T1aN0M0 | 19051716 | 12100124 | 68276747 |
| F8 | 48 | Malignant theca folliculi tumor                                  | T3N0M0  | 1.83E+08 | 1.2E+08  | 2.34E+08 |
| F9 | 24 | Endodermal sinus carcinoma                                       | T2N0M0  | 76785955 | 33470026 | 1.35E+08 |
| G1 | 48 | Metastatic adenocarcinoma                                        | -       | 33036745 | 15798361 | 75809445 |
| G2 | 40 | Metastatic adenocarcinoma                                        | -       | 7920619  | 1476305  | 23728773 |
| G3 | 38 | Metastatic adenocarcinoma                                        | -       | 45908959 | 4400885  | 1.24E+08 |
| G4 | 55 | Metastatic adenocarcinoma                                        | -       | 56573181 | 5785045  | 4.02E+08 |
| G5 | 66 | Metastatic adenocarcinoma                                        | -       | 63592848 | 32741670 | 1.46E+08 |
| G6 | 30 | Metastatic adenocarcinoma                                        | -       | 31476216 | 32868608 | 709211   |
| G7 | 53 | Metastatic adenocarcinoma                                        | -       | 66046967 | 12302502 | 34439353 |
| G8 | 31 | Metastatic adenocarcinoma                                        | -       | 80503988 | 45028955 | 1.37E+08 |
| G9 | 62 | Malignant change of benign teratoma (squamous cell carcinoma II) | -       | 78017604 | 15885543 | 57356202 |
| H1 | 39 | Adjacent normal ovary tissue                                     | -       | 3429112  | 8263822  | 3533690  |
| H2 | 49 | Adjacent normal ovary tissue                                     | -       | 27115232 | 8577707  | 1.09E+08 |
| H3 | 48 | Adjacent normal ovary tissue                                     | -       | 9216120  | 854294   | 41340966 |
| H4 | 42 | Adjacent normal ovary tissue                                     | -       | 24175896 | 31645929 | 25470925 |
| H5 | 41 | Adjacent normal ovary tissue                                     | -       | 28519514 | 9020681  | 1.1E+08  |
| H6 | 53 | Adjacent normal ovary tissue                                     | -       | 1.08E+08 | 28097016 | 74825052 |
| H7 | 20 | Ovary tissue                                                     | -       | 1.16E+08 | 58538805 | 5204113  |
| H8 | 15 | Ovary tissue                                                     | -       | 53779029 | 19825803 | 19973217 |
| H9 | 19 | Ovary tissue                                                     | -       | 22686297 | 3484556  | 376305   |
